# Supplementary material for: Bioconversion of Different Waste Streams of Animal and Vegetal Origin and Manure by Black Soldier Fly Larvae Hermetia illucens L. (Diptera: Stratiomyidae)
Source: MDPI journal article supplement (doi:10.3390/insects14020204), 2023-02-17
Supplement: s1 [file s1]

**Table S1.** Fatty acid profile of the larvae reared on different substrates <sup>1</sup> (all fatty acids expressed in % of dry matter).

| Parameter                                          | CF                 | PMLSG | OWF               | SW                 | FFW                | MS | PMS                | SEM   | P-value |
|----------------------------------------------------|--------------------|-------|-------------------|--------------------|--------------------|----|--------------------|-------|---------|
| Myristoleic acid C 14:1                            | 0.03 <sup>b</sup>  | -     | 0.02 <sup>b</sup> | 0.06 <sup>ab</sup> | 0.12 <sup>a</sup>  | -  | 0.06 <sup>ab</sup> | 0.01  | 0.0036  |
| Pentadecanoic acid C 15:0                          | 0.03               | -     | 0.03              | 0.07               | 0.08               | -  | 0.08               | 0.01  | 0.0411  |
| Hexadecanoic acid trans-isomers C 16:1 trans       | -                  | -     | -                 | 0.02               | -                  | -  | 0.02               | 0.002 | 0.7476  |
| Palmitoleic acid C 16:1                            | 0.30               | -     | 0.16              | 1.20               | 0.77               | -  | 0.80               | 0.35  | 0.2974  |
| Margaric acid C 17:0                               | 0.06 <sup>ab</sup> | -     | 0.03 <sup>b</sup> | 0.05 <sup>ab</sup> | 0.08 <sup>a</sup>  | -  | 0.06 <sup>ab</sup> | 0.005 | 0.0060  |
| Stearic acid C 18:0                                | 0.54 <sup>ab</sup> | -     | 0.27 <sup>b</sup> | 0.76 <sup>ab</sup> | 1.08 <sup>a</sup>  | -  | 0.55 <sup>ab</sup> | 0.16  | 0.0633  |
| Octadecenoic acid trans-isomers C 18:1 trans       | 0.04               | -     | 0.03              | 0.11               | 0.13               | -  | 0.09               | 0.02  | 0.0667  |
| Oleic acid C 18:1                                  | 2.28 <sup>b</sup>  | -     | 2.04 <sup>b</sup> | 4.66 <sup>ab</sup> | 9.51 <sup>a</sup>  | -  | 3.17 <sup>b</sup>  | 1.26  | 0.0164  |
| Cis-vaccenic acid C 18:1                           | 0.10               | -     | 0.04              | 0.19               | 0.21               | -  | 0.12               | 0.05  | 0.2816  |
| Octadecadienoic acid trans-isomers C 18:2 trans    | 0.03 <sup>ab</sup> | -     | -                 | -                  | 0.08 <sup>a</sup>  | -  | 0.02 <sup>b</sup>  | 0.01  | 0.0333  |
| Linolic acid C 18:2 omega-6                        | 2.64 <sup>ab</sup> | -     | 1.09 <sup>b</sup> | 2.61 <sup>ab</sup> | 4.84 <sup>a</sup>  | -  | 1.72 <sup>ab</sup> | 0.73  | 0.0537  |
| Octadecatetrienic acid, trans-isomers C 18:3 trans | 0.04               | -     | -                 | -                  | 0.05               | -  | -                  | 0.02  | 0.8348  |
| Alpha-linolenic acid C 18:3 omega-3                | 0.25               | -     | 0.11              | 0.20               | 0.39               | -  | 0.13               | 0.06  | 0.0684  |
| Arachic acid C 20:0                                | 0.02 <sup>b</sup>  | -     | 0.01 <sup>b</sup> | 0.02 <sup>b</sup>  | 0.05 <sup>a</sup>  | -  | 0.02 <sup>b</sup>  | 0.005 | 0.0060  |
| Eicosenoic acid C 20:1                             | 0.40 <sup>a</sup>  | -     | 0.11 <sup>b</sup> | 0.16 <sup>b</sup>  | 0.31 <sup>ab</sup> | -  | 0.12 <sup>b</sup>  | 0.05  | 0.0073  |
| Arachidonic acid C 20:4 omega-6                    | -                  | -     | 0.02              | -                  | -                  | -  | 0.04               | 0.02  | 0.5682  |
| Eicosapentaenic acid C 20:5 omega-3                | -                  | -     | 0.03              | 0.04               | -                  | -  | 0.02               | 0.01  | 0.4256  |

Means with different superscript letters differ significantly (two-way ANOVA followed by Tukey's post hoc test analysis  $p < 0.05$ ). <sup>1</sup> Chicken feed (CF; control diet), Pig manure slurry mixed with roadside silage grass (PMLSG), Organic wet fraction (OWF), Slaughter waste (SW), Fastfood waste (FFW), Mushroom stems (MS), Pig manure solid (PMS). (-) below the limit of detection
